# Supplementary material for: Near-real-time monitoring of global CO2 emissions reveals the effects of the COVID-19 pandemic
Source: PubMed Central journal article supplement (PMC7560733; doi:10.1038/s41467-020-18922-7), 2020-10-14
Supplement: 41467_2020_18922_MOESM1_ESM.pdf [file 41467_2020_18922_MOESM1_ESM.pdf]

# Supplementary Information

## Near-real-time monitoring of global CO<sub>2</sub> emissions reveals the effects of the COVID-19 pandemic

Zhu Liu<sup>1\*†</sup>, Philippe Ciais<sup>2†</sup>, Zhu Deng<sup>1†</sup>, Ruixue Lei<sup>3</sup>, Steven J. Davis<sup>4</sup>, Sha Feng<sup>3</sup>, Bo Zheng<sup>2</sup>, Duo Cui<sup>1</sup>, Xinyu Dou<sup>1</sup>, Biqing Zhu<sup>1</sup>, Rui Guo<sup>1</sup>, Piyu Ke<sup>1</sup>, Taochun Sun<sup>1</sup>, Chenxi Lu<sup>1</sup>, Pan He<sup>1</sup>, Yuan Wang<sup>5,6</sup>, Xu Yue<sup>7</sup>, Yilong Wang<sup>8</sup>, Yadong Lei<sup>9</sup>, Hao Zhou<sup>9</sup>, Zhaonan Cai<sup>10</sup>, Yuhui Wu<sup>11</sup>, Runtao Guo<sup>12</sup>, Tingxuan Han<sup>13</sup>, Jinjun Xue<sup>14, 15, 16</sup>, Olivier Boucher<sup>17</sup>, Eulalie Boucher<sup>17</sup>, Frédéric Chevallier<sup>2</sup>, Katsumasa Tanaka<sup>2,27</sup>, Yimin Wei<sup>18</sup>, Haiwang Zhong<sup>19</sup>, Chongqing Kang<sup>19</sup>, Ning Zhang<sup>20</sup>, Bin Chen<sup>21</sup>, Fengming Xi<sup>22</sup>, Miaomiao Liu<sup>23</sup>, François-Marie Bréon<sup>2</sup>, Yonglong Lu<sup>24</sup>, Qiang Zhang<sup>1</sup>, Dabo Guan<sup>1</sup>, Peng Gong<sup>1</sup>, Daniel M. Kammen<sup>25</sup>, Kebin He<sup>11</sup> and Hans Joachim Schellnhuber<sup>26,1</sup>

1 Department of Earth System Science, Tsinghua University, Beijing, China.

2 Laboratoire des Sciences du Climate et de l'Environnement LSCE, Orme de Merisiers, Gif-sur-Yvette, France

3 Department of Meteorology and Atmospheric Science, The Pennsylvania State University, University Park, PA, USA

4 Department of Earth System Science, University of California, Irvine, 3232 Croul Hall, Irvine, CA, USA

5 Division of Geological and Planetary Sciences, California Institute of Technology, Pasadena, CA, USA

6 Jet Propulsion Laboratory, California Institute of Technology, Pasadena, CA, USA

7 Jiangsu Key Laboratory of Atmospheric Environment Monitoring and Pollution Control, Collaborative Innovation

Center of Atmospheric Environment and Equipment Technology, School of Environmental Science and Engineering,

Nanjing University of Information Science & Technology, Nanjing, China

8 Key Laboratory of Land Surface Pattern and Simulation, Institute of Geographical Sciences and Natural Resources

Research, Chinese Academy of Sciences, Beijing, China

9 Climate Change Research Center, Institute of Atmospheric Physics, Chinese Academy of Sciences, Beijing, China

10 Key Laboratory of Middle Atmosphere and Global Environment Observation, Institute of Atmospheric Physics,

Chinese Academy of Sciences, Beijing, China.

11 School of Environment, Tsinghua University, Beijing, China

12 School of Mathematical School, Tsinghua University, Beijing, China

13 Department of Mathematical Sciences, Tsinghua University, Beijing, China

14 Center of Hubei Cooperative Innovation for Emissions Trading System, Wuhan, China

15 Faculty of Management and Economics, Kunming University of Science and Technology, 13 Kunming, China

16 Economic Research Centre of Nagoya University, Furo-cho, Chikusa-ku, Nagoya, Japan

17 Institut Pierre-Simon Laplace, Sorbonne Université / CNRS, Paris, France

18 Center for Energy and Environmental Policy Research, Beijing Institute of Technology, Beijing, China

19 Department of Electrical Engineering, the State Key Lab of Control and Simulation of Power Systems and

Generation Equipment, Institute for National Governance and Global Governance, Tsinghua University, Beijing, China

20 Jinan University, Guangzhou, China

21 Beijing Normal University, Beijing, China

22 Institute of Applied Ecology, Chinese Academy of Sciences, Shenyang, China

23 State Key Laboratory of Pollution Control and Resource Reuse, School of the Environment, Nanjing University,

Nanjing, China

24 Key Laboratory of Wetland Ecology of Ministry of Education, College of Ecology and the Environment, Xiamen

University, Xiamen, China

25 Energy and Resources Group and Goldman School of Public Policy, University of California, Berkeley, CA, USA

26 Potsdam Institute for Climate Impact Research, Potsdam, Germany

27 Center for Global Environmental Research, National Institute for Environmental Studies, Tsukuba, Japan

\* Corresponding authors: zhuliu@tsinghua.edu.cn

† Authors contributed equally

51 **Supplementary Figures**

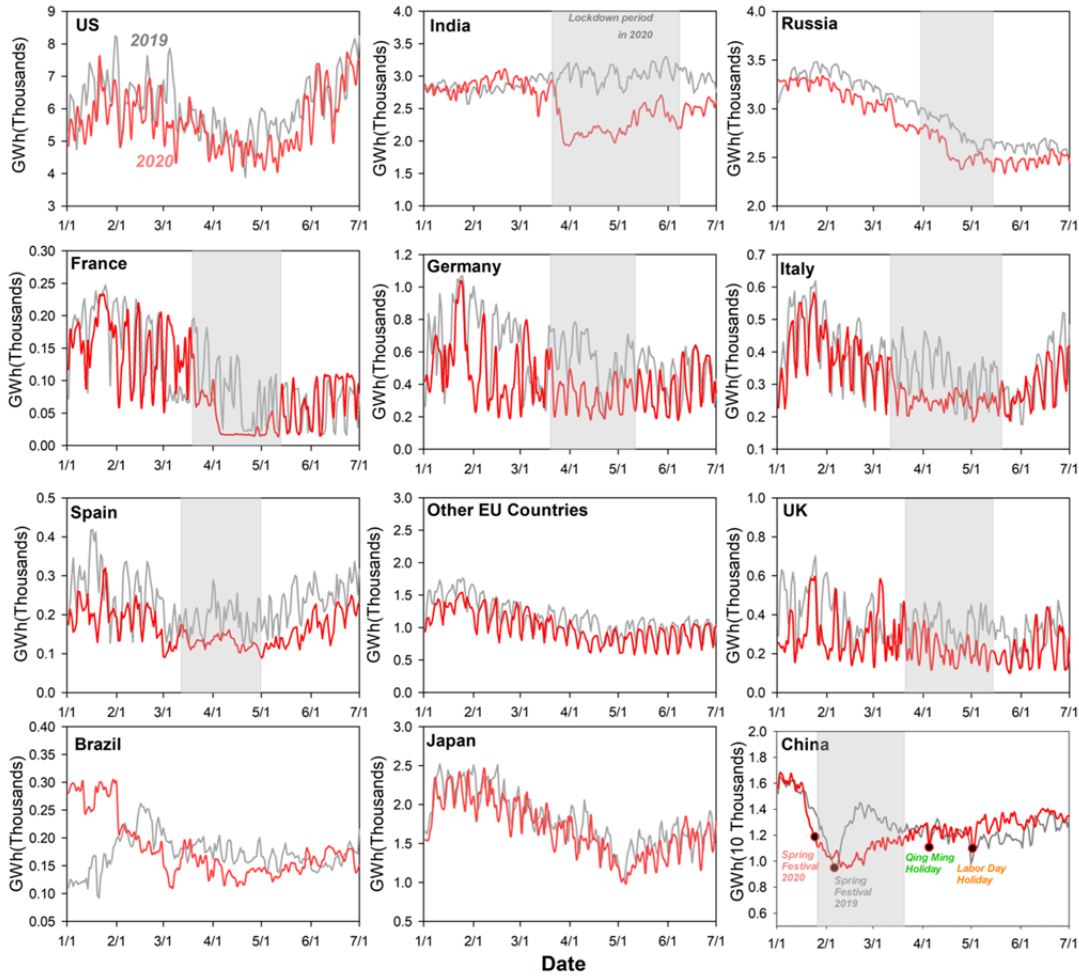

52

53 **Supplementary Figure 1 | Daily thermal generation for countries.** Daily thermal generation (or  
 54 total electricity generation, i.e. Russia) in 2019 (grey lines) and 2020 (red lines) in the U.S., India,  
 55 Russia, France, Germany, Italy, Spain, other EU countries (Austria, Belgium, Bulgaria, Cyprus,  
 56 Czech Republic, Denmark, Estonia, Finland, Greece, Hungary, Ireland, Latvia, Lithuania,  
 57 Netherlands, Poland, Portugal, Romania, Slovakia, Slovenia, Sweden), UK, Brazil, Japan and  
 58 China (grey areas represent the national lockdown periods in 2020).

59

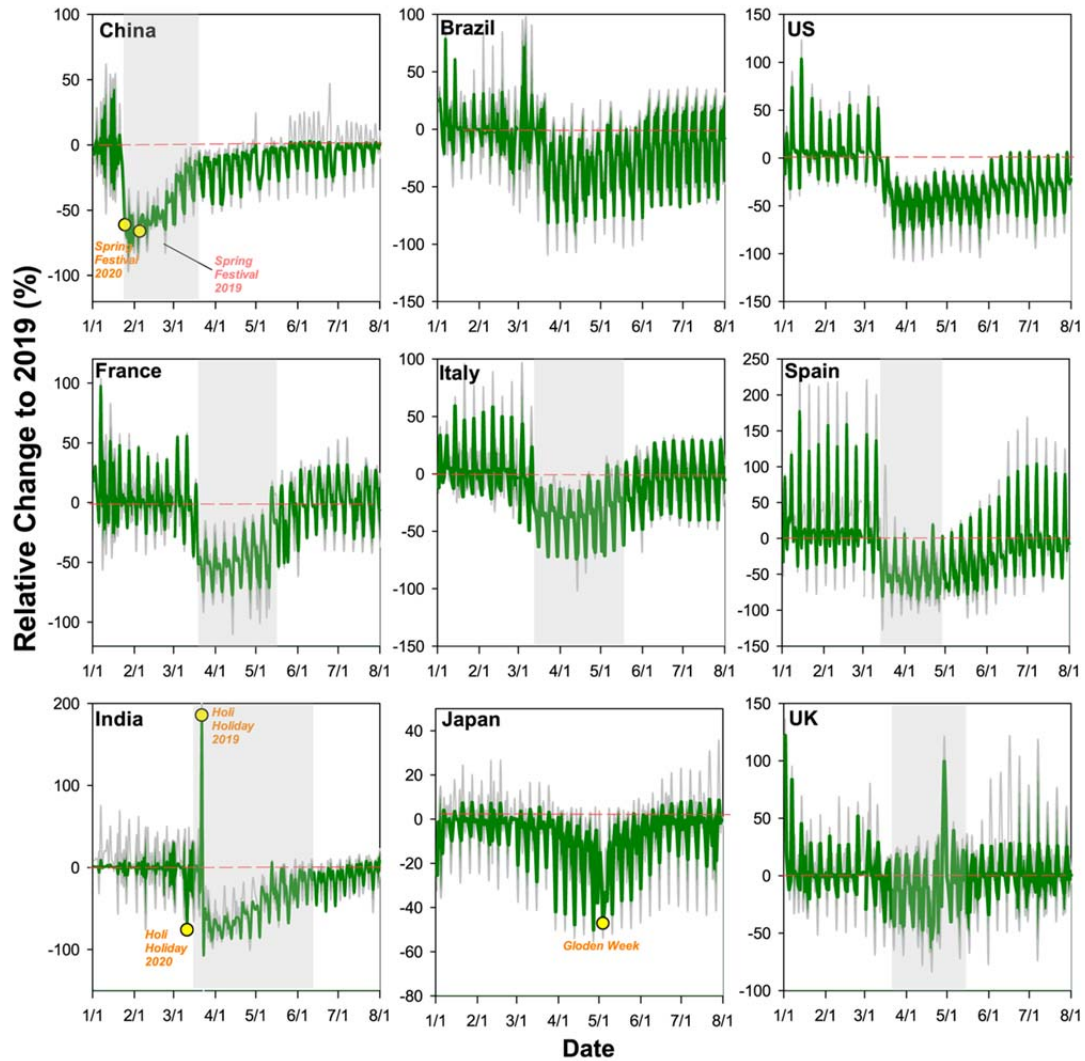

61

62 **Supplementary Figure 2 | Daily CO<sub>2</sub> emission changes in the ground (road) transport sector.**

63 Daily emission changes in the ground (road) transport sector in the first half year of 2020 (green

64 lines; grey lines for uncertainties; grey areas for the national lockdown periods in 2020).

65

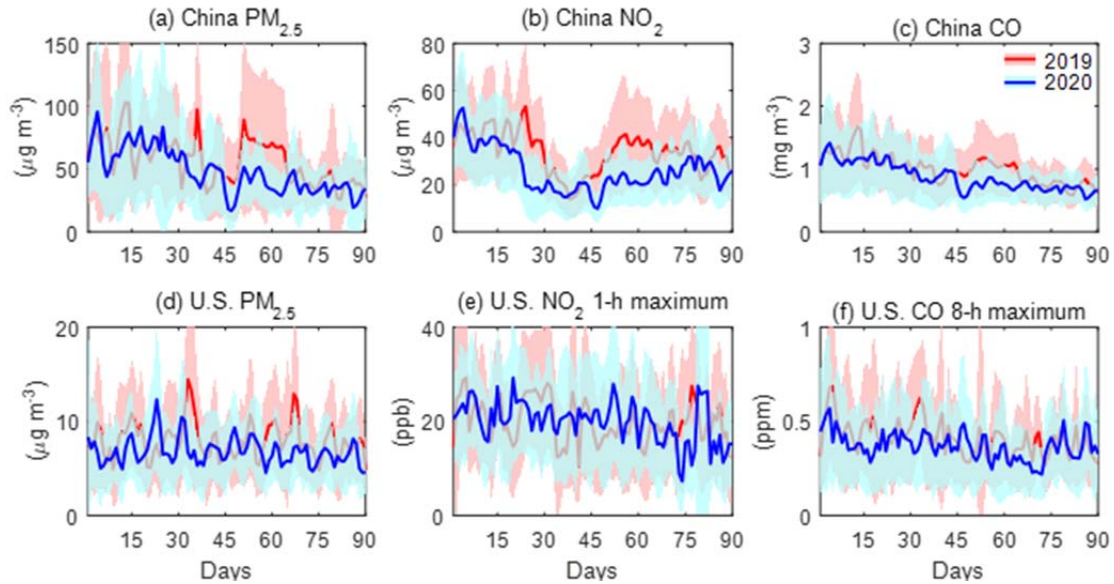

67

68 **Supplementary Figure 3 | Daily variations of surface PM<sub>2.5</sub>, NO<sub>2</sub> and CO concentrations.**

69 Daily variations of surface (a, d) PM<sub>2.5</sub>, (b, d) NO<sub>2</sub>, (c, f) CO concentrations from (a-c) China and  
 70 (d-f) U.S. during the first quarters of 2019 and 2020. The bold lines are the mean values from all  
 71 quality-controlled sites, with shadings indicating one standard deviation. The data on February 29<sup>th</sup>  
 72 2020 are removed from the plot.

73

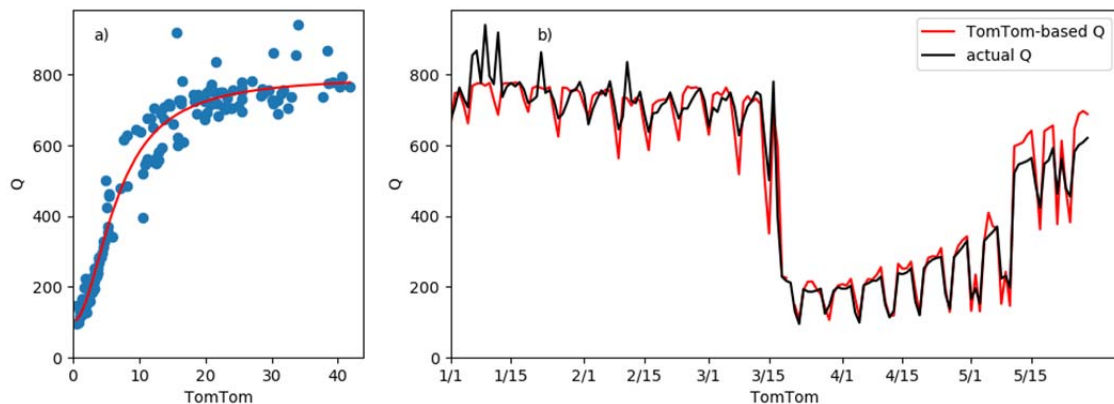

74

75 **Supplementary Figure 4 | The relationship between TomTom congestion level with the**

76 **daily mean car counts.** The relationship between TomTom congestion index and the actual  
 77 vehicle counts (Q in number of vehicles per hour each day) for Paris. a) the regression between  
 78 TomTom congestion level (x-axis) and Q (y-axis); b) Q reconstructed based on TomTom  
 79 congestion indexes (red) and the actual Q.

80

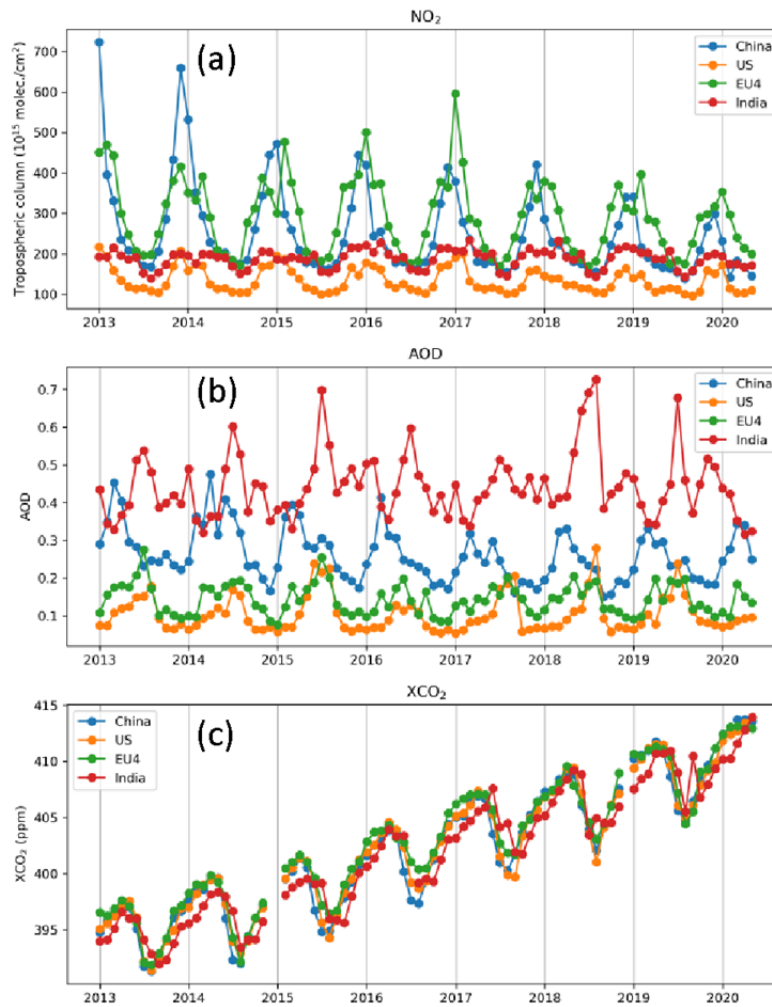

81

82 **Supplementary Figure 5 | Monthly series of NO<sub>2</sub>, aerosol optical depth (AOD) and column**  
 83 **CO<sub>2</sub> mixing ratio (XCO<sub>2</sub>).** Monthly series of a) NO<sub>2</sub> from OMI, b) aerosol optical depth (AOD)  
 84 from MODIS and c) column CO<sub>2</sub> mixing ratio (XCO<sub>2</sub>) from GOSAT over China, US, selected EU  
 85 countries (UK, Germany, Italy and France), and India.

86

87

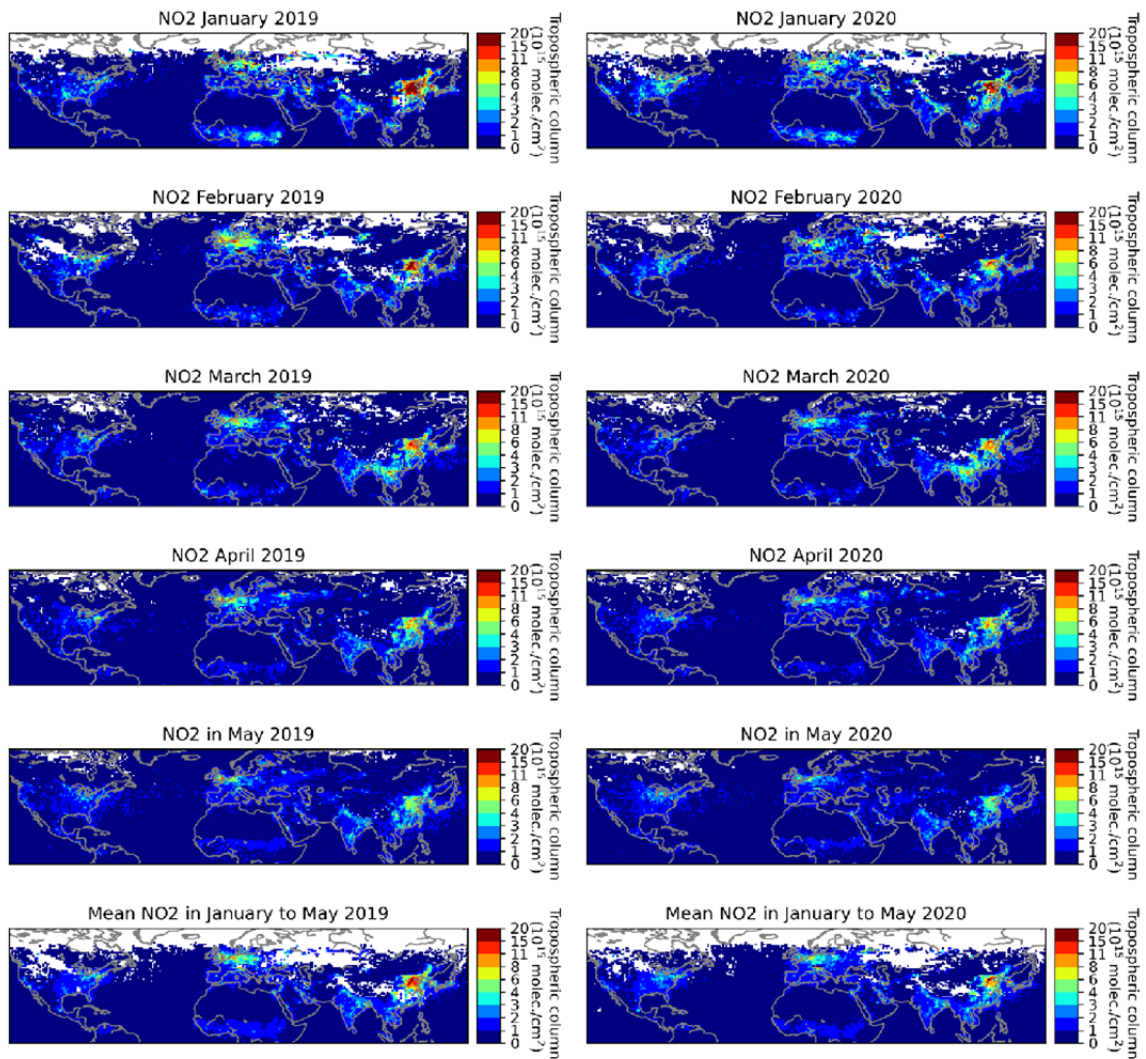

88

89 **Supplementary Figure 6 | Tropospheric column NO<sub>2</sub> observation.** Tropospheric column NO<sub>2</sub>  
 90 observation in January - May of 2020. Source maps from GSHHG (Global Self-consistent,  
 91 Hierarchical, High-resolution Geography Database)<sup>1</sup>.

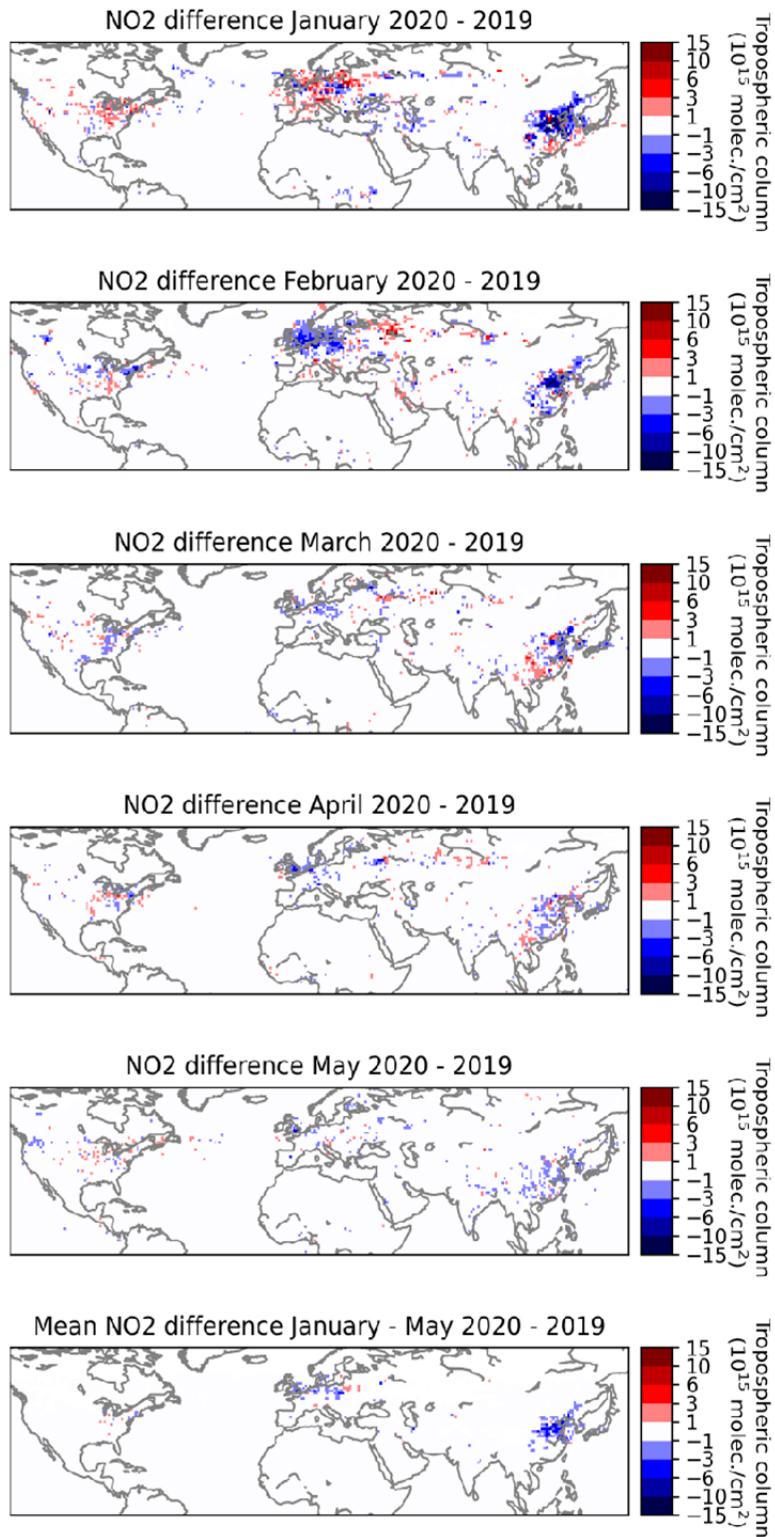

92

93 **Supplementary Figure 7 | Difference of tropospheric column NO<sub>2</sub> observation.** Difference of  
 94 tropospheric column NO<sub>2</sub> observation in January - May of 2020. Source maps from GSHHG  
 95 (Global Self-consistent, Hierarchical, High-resolution Geography Database)<sup>1</sup>.

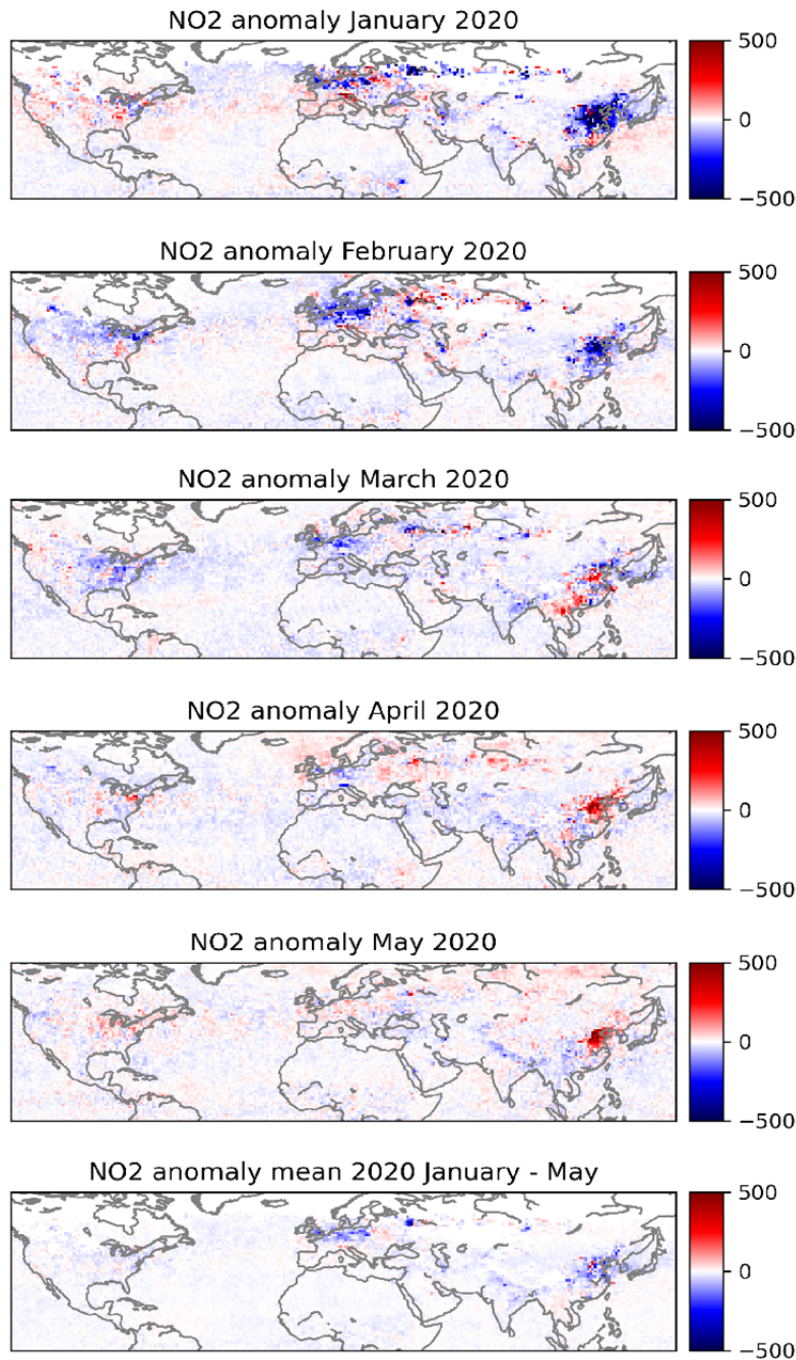

96

97 **Supplementary Figure 8 | Anomaly of monthly NO<sub>2</sub>.** Anomaly of NO<sub>2</sub> from OMI in the January  
 98 - May of 2020

99 The anomaly maps conducted by apply the same algorithm on every grid point. The anomaly  
 100 defined as the deseasonalized value. For NO<sub>2</sub> (Supplementary Fig. 8), the anomaly along the  
 101 eastern coast of China was negative in January and February 2020, then partially become positive.  
 102 About half of the anomalies over U.S. and Europe were positive in January 2020, then most areas  
 103 over U.S. and Europe became negative, which also matches the COVID-19 epidemic delays  
 104 compared to China. Source maps from GSHHG (Global Self-consistent, Hierarchical, High-  
 105 resolution Geography Database)<sup>1</sup>.



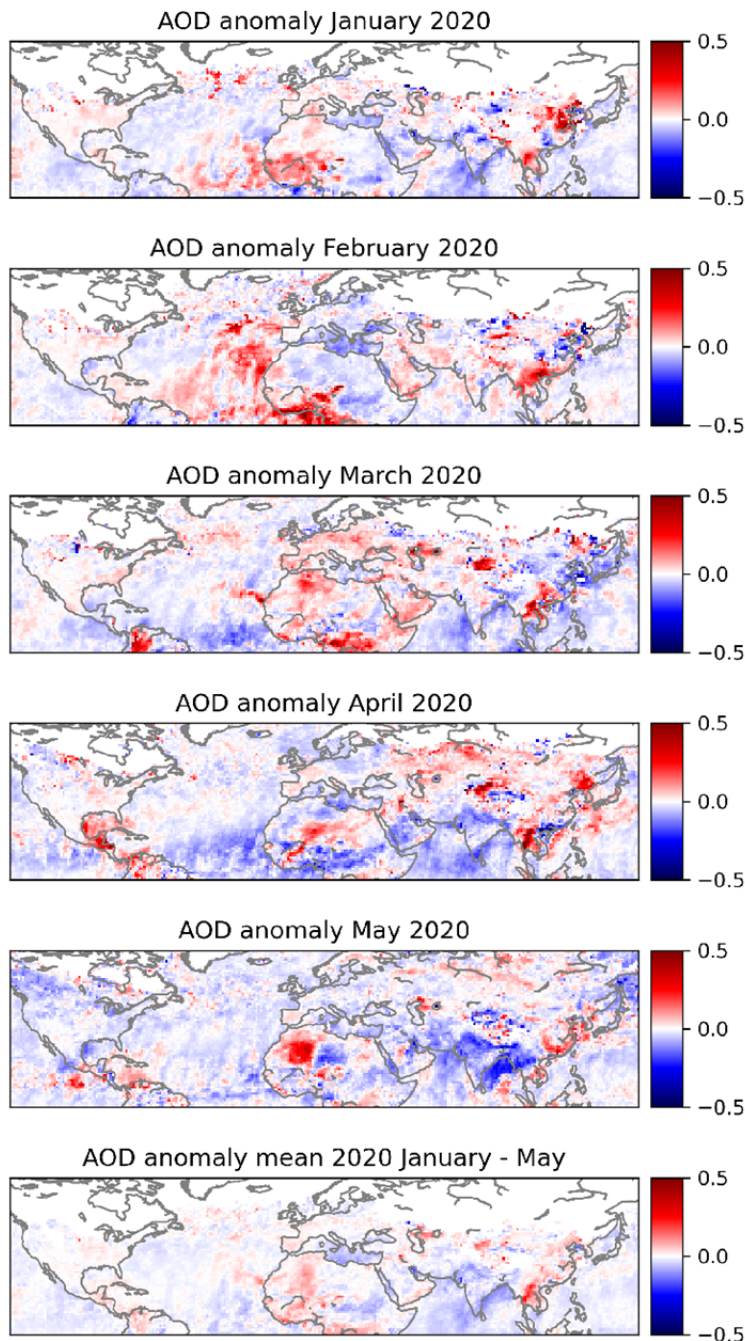

106 **Supplementary Figure 9 | Anomaly of monthly AOD.** Anomaly of AOD from MODIS in the  
 107 January - May of 2020

108 The anomaly maps conducted by apply the same algorithm on every grid point. The anomaly  
 109 defined as the deseasonalized value. For AOD (Supplementary Fig. 9), the negative anomaly area  
 110 along the eastern coast of China expanded from January to March 2020. For US and Europe, AOD  
 111 anomalies on land did not change too much. The shutdown of COVID-19 may not affect AOD  
 112 over them since their AOD was always Low. Source maps from GSHHG (Global Self-  
 113 consistent, Hierarchical, High-resolution Geography Database) <sup>1</sup>..

114

115 **Supplementary Tables**

116 **Supplementary Table 1 | Sectoral changes of CO<sub>2</sub> emission** (2020 compared to the same  
117 periods in 2019).

| Unit: MtCO <sub>2</sub>       | Power  | Ground Transport | Industry (with Process) | Residential | Domestic Aviation | Sum     | Decline (%) |
|-------------------------------|--------|------------------|-------------------------|-------------|-------------------|---------|-------------|
| <b>China</b>                  | -31.3  | -96.8            | -40.0                   | -8.0        | -11.1             | -187.2  | -3.7%       |
| <b>India</b>                  | -83.6  | -33.6            | -92.6                   | 7.0         | -2.3              | -205.2  | -15.4%      |
| <b>U.S.</b>                   | -66.3  | -195.8           | -36.5                   | -14.7       | -24.9             | -338.3  | -13.3%      |
| <b>EU27 &amp; UK</b>          | -98.5  | -43.6            | -43.5                   | -17.0       | -3.1              | -205.7  | -12.7%      |
| <b>Russia</b>                 | -20.6  | -8.6             | -3.3                    | -6.8        | -1.2              | -40.5   | -5.3%       |
| <b>Japan</b>                  | -16.0  | -7.9             | -16.2                   | -2.1        | -1.0              | -43.1   | -7.5%       |
| <b>Brazil</b>                 | 1.3    | -17.4            | -8.3                    | 0.0         | -1.5              | -25.9   | -12.0%      |
| <b>ROW</b>                    | -26.3  | -209.6           | -23.1                   | -0.9        | -9.8              | -269.6  | -5.5%       |
| <b>International Aviation</b> |        |                  |                         |             |                   | -146.0  | -48.5%      |
| <b>International Shipping</b> |        |                  |                         |             |                   | -89.1   | -25.0%      |
| <b>Sum</b>                    | -341.4 | -613.3           | -263.5                  | -42.5       | -54.8             | -1550.5 | -8.8%       |
| <b>Decline (%)</b>            | -5.0%  | -18.6%           | -5.5%                   | -2.2%       | -35.1%            | -8.8%   |             |

118

119

120 **Supplementary Table 2 | Monthly changes of CO<sub>2</sub> emissions in the power sector** (2020  
121 compared to the same periods in 2019).

|         | China  | India  | U.S.   | EU27 & UK | Russia | Japan  | Brazil | ROW    | World |
|---------|--------|--------|--------|-----------|--------|--------|--------|--------|-------|
| Jan     | -3.6%  | -0.3%  | -9.7%  | -18.8%    | -1.8%  | -6.2%  | 101.6% | 0.0%   | -4.2% |
| Feb     | -14.4% | 9.0%   | -3.0%  | -20.3%    | -2.5%  | -2.4%  | -9.0%  | 3.8%   | -5.1% |
| Mar     | -8.0%  | -12.8% | -9.0%  | -10.8%    | -6.5%  | -3.6%  | -16.7% | -2.7%  | -7.1% |
| Apr     | 1.1%   | -29.9% | -8.4%  | -30.8%    | -8.9%  | -9.1%  | -21.0% | -10.1% | -9.7% |
| May     | 11.5%  | -20.7% | -13.9% | -26.3%    | -6.6%  | -12.8% | -11.5% | -0.8%  | -3.3% |
| Jun     | 5.5%   | -17.8% | -2.0%  | -9.2%     | -4.9%  | -2.8%  | 5.0%   | 0.4%   | -1.1% |
| Jan-Feb | -8.3%  | 4.1%   | -6.6%  | -19.5%    | -2.1%  | -4.4%  | 36.7%  | 1.7%   | -4.6% |
| Jan-Mar | -8.2%  | -1.9%  | -7.4%  | -17.0%    | -3.6%  | -4.2%  | 17.9%  | 0.3%   | -5.4% |
| Jan-Apr | -6.0%  | -9.2%  | -7.6%  | -19.9%    | -4.8%  | -5.2%  | 8.5%   | -2.1%  | -6.4% |
| Jan-May | -2.8%  | -11.7% | -8.9%  | -21.0%    | -5.1%  | -6.4%  | 4.7%   | -1.8%  | -5.8% |
| Jan-Jun | -1.4%  | -12.7% | -7.6%  | -19.3%    | -5.1%  | -5.9%  | 4.7%   | -1.5%  | -5.0% |

122

123

124

125

126

127 **Supplementary Table 3 | Monthly changes of CO2 emissions in the industry sector (2020**  
 128 **compared to the same periods in 2019).**

|         | China  | India  | U.S.   | EU27 & UK | Russia | Japan  | Brazil | ROW   | World  |
|---------|--------|--------|--------|-----------|--------|--------|--------|-------|--------|
| Jan     | -6.4%  | 1.8%   | -0.7%  | -1.2%     | 3.9%   | -2.4%  | 1.5%   | 0.0%  | -2.4%  |
| Feb     | -16.8% | 3.8%   | 0.0%   | -1.6%     | 4.9%   | -5.6%  | -0.4%  | 4.6%  | -4.2%  |
| Mar     | -8.0%  | -22.4% | -5.4%  | -12.8%    | 2.6%   | -5.3%  | -4.2%  | -2.2% | -7.3%  |
| Apr     | 3.4%   | -67.1% | -20.5% | -29.6%    | -9.9%  | -15.1% | -31.6% | -9.7% | -11.2% |
| May     | 4.4%   | -39.3% | -16.6% | -21.6%    | -7.2%  | -26.3% | -23.7% | -1.1% | -5.4%  |
| Jun     | 3.8%   | -10.7% | -11.1% | -18.0%    | -6.4%  | -17.7% | -10.0% | 0.0%  | -2.0%  |
| Jan-Feb | -10.9% | 2.8%   | -0.4%  | -1.4%     | 4.4%   | -4.0%  | 0.6%   | 2.1%  | -3.2%  |
| Jan-Mar | -9.7%  | -6.1%  | -2.1%  | -5.2%     | 3.7%   | -4.5%  | -1.1%  | 0.5%  | -4.7%  |
| Jan-Apr | -5.9%  | -20.5% | -6.7%  | -11.3%    | 0.1%   | -7.1%  | -9.1%  | -2.3% | -6.5%  |
| Jan-May | -3.4%  | -24.3% | -8.6%  | -13.4%    | -1.4%  | -10.8% | -12.3% | -2.0% | -6.3%  |
| Jan-Jun | -2.1%  | -22.1% | -9.1%  | -14.1%    | -2.3%  | -12.0% | -11.9% | -1.7% | -5.5%  |

129

130

131

132 **Supplementary Table 4 | Monthly changes of CO2 emissions in the ground**  
 133 **transportation sector (2020 compared to the same periods in 2019).**

|         | China  | India  | U.S.   | EU27 & UK | Russia | Japan  | Brazil | ROW    | World  |
|---------|--------|--------|--------|-----------|--------|--------|--------|--------|--------|
| Jan     | -18.6% | 0.2%   | 7.7%   | 5.4%      | 6.1%   | -3.0%  | 1.8%   | 3.2%   | 1.3%   |
| Feb     | -53.8% | 1.9%   | 9.3%   | 7.1%      | 6.0%   | 0.9%   | -0.2%  | 0.6%   | -3.5%  |
| Mar     | -25.0% | -25.7% | -23.5% | -16.7%    | -3.2%  | -7.1%  | -15.2% | -22.2% | -21.0% |
| Apr     | -16.1% | -65.6% | -49.1% | -31.9%    | -26.1% | -17.4% | -37.7% | -41.9% | -38.6% |
| May     | -10.8% | -34.4% | -45.7% | -20.7%    | -20.4% | -18.4% | -34.2% | -37.9% | -32.6% |
| Jun     | -5.9%  | -16.7% | -30.2% | -1.2%     | -4.9%  | -4.0%  | -19.0% | -14.1% | -15.2% |
| Jul     | -4.2%  | -7.2%  | -30.9% | -0.3%     | -3.5%  | -4.0%  | -15.6% | -9.3%  | -13.0% |
| Jan-Feb | -35.4% | 1.0%   | 8.5%   | 6.2%      | 6.1%   | -1.1%  | 0.8%   | 1.9%   | -1.0%  |
| Jan-Mar | -31.8% | -8.1%  | -2.7%  | -1.8%     | 2.8%   | -3.2%  | -4.8%  | -6.5%  | -8.0%  |
| Jan-Apr | -27.9% | -22.3% | -14.7% | -9.4%     | -4.6%  | -6.7%  | -13.2% | -15.4% | -15.7% |
| Jan-May | -24.4% | -24.8% | -21.2% | -11.7%    | -7.9%  | -9.1%  | -17.6% | -20.1% | -19.2% |
| Jan-Jun | -21.4% | -23.5% | -22.7% | -10.0%    | -7.4%  | -8.3%  | -17.8% | -19.2% | -18.6% |
| Jan-Jul | -18.9% | -21.1% | -24.0% | -8.5%     | -6.8%  | -7.7%  | -17.5% | -17.8% | -17.8% |

134

135

136

137

138 **Supplementary Table 5 | Monthly changes of CO2 emissions in the aviation Sector (2020**  
 139 **compared to the same periods in 2019).**

| Month   | Domestic |        |        |              |        |        |        |        | Intern<br>ational | World  |        |
|---------|----------|--------|--------|--------------|--------|--------|--------|--------|-------------------|--------|--------|
|         | China    | India  | U.S.   | EU27<br>& UK | Russia | Japan  | Brazil | ROW    |                   |        |        |
| Jan     | 2.4%     | 4.4%   | 8.5%   | 0.0%         | 14.4%  | 7.2%   | 6.4%   | 7.9%   | 6.8%              | 3.7%   | 4.8%   |
| Feb     | -71.2%   | 11.6%  | 12.1%  | 2.7%         | 13.1%  | 10.3%  | 9.5%   | 9.2%   | -5.4%             | -3.0%  | -3.8%  |
| Mar     | -56.4%   | -18.8% | -13.2% | -44.6%       | 6.1%   | -4.0%  | -18.3% | -20.3% | -22.7%            | -39.5% | -33.6% |
| Apr     | -51.7%   | -98.6% | -65.4% | -90.9%       | -65.6% | -47.3% | -87.7% | -80.5% | -67.6%            | -83.5% | -78.1% |
| May     | -34.9%   | -93.7% | -64.4% | -87.9%       | -64.1% | -75.3% | -83.2% | -77.9% | -63.8%            | -78.8% | -73.7% |
| Jun     | -24.6%   | -70.8% | -53.4% | -76.5%       | -36.5% | -61.0% | -76.0% | -64.2% | -51.8%            | -78.5% | -69.6% |
| Jul     | -14.7%   | -70.3% | -41.9% | -48.8%       | -9.8%  | -36.9% | -69.7% | -54.1% | -39.6%            | -72.0% | -61.3% |
| Jan-Feb | -33.7%   | 7.8%   | 10.2%  | 1.3%         | 13.8%  | 8.7%   | 7.8%   | 8.6%   | 0.9%              | 0.5%   | 0.7%   |
| Jan-Mar | -41.2%   | -1.1%  | 1.6%   | -15.2%       | 11.1%  | 4.3%   | -0.5%  | -1.5%  | -7.4%             | -13.5% | -11.4% |
| Jan-Apr | -43.8%   | -24.0% | -15.9% | -35.6%       | -9.1%  | -8.5%  | -20.4% | -21.6% | -22.8%            | -31.8% | -28.7% |
| Jan-May | -42.0%   | -38.4% | -26.4% | -47.2%       | -21.5% | -22.5% | -31.7% | -33.4% | -31.5%            | -41.8% | -38.3% |
| Jan-Jun | -39.1%   | -43.9% | -31.3% | -52.7%       | -24.5% | -29.0% | -38.4% | -38.8% | -35.1%            | -48.5% | -43.9% |
| Jan-Jul | -35.3%   | -47.8% | -33.0% | -52.0%       | -21.9% | -30.2% | -43.2% | -41.2% | -35.8%            | -52.4% | -46.7% |

140

141

142

143

144 **Supplementary Table 6 | The observation of air quality and dry column CO<sub>2</sub> (XCO<sub>2</sub>)**

145 (2020 compared to the same periods in 2019).

|                        |         | China            | U.S.             | EU4              | India            |
|------------------------|---------|------------------|------------------|------------------|------------------|
| OMI NO <sub>2</sub>    | Jan     | -32.26% ± 11.93% | 22.98% ± 15.94%  | 15.78% ± 15.39%  | -8.96% ± 13.55%  |
|                        | Feb     | -34.22% ± 12.00% | -23.08% ± 12.45% | -25.12% ± 12.52% | -13.79% ± 13.16% |
|                        | Mar     | -4.53% ± 13.73%  | -14.32% ± 13.16% | -15.56% ± 13.15% | -13.37% ± 13.17% |
|                        | Apr     | -3.59% ± 13.97%  | -2.16% ± 13.89%  | -23.40% ± 12.52% | -11.10% ± 13.40% |
|                        | May     | -12.63% ± 13.40% | -1.25% ± 13.98%  | -12.49% ± 13.37% | -8.12% ± 13.57%  |
|                        | Jan-May | -20.18% ± 12.99% | -3.70% ± 13.93%  | -12.69% ± 13.20% | -11.09% ± 13.43% |
| MODIS AOD              | Jan     | 10.17% ± 48.48%  | 10.64% ± 95.09%  | 19.81% ± 77.91%  | -5.46% ± 36.66%  |
|                        | Feb     | -7.88% ± 41.27%  | -3.98% ± 82.63%  | -1.95% ± 70.87%  | 7.29% ± 40.64%   |
|                        | Mar     | 3.55% ± 41.33%   | -15.65% ± 66.76% | 29.42% ± 62.13%  | 1.84% ± 40.56%   |
|                        | Apr     | 17.35% ± 45.72%  | 20.16% ± 86.26%  | -23.83% ± 46.27% | -7.65% ± 39.46%  |
|                        | May     | -15.88% ± 40.58% | -35.61% ± 51.83% | -3.74% ± 58.60%  | -19.66% ± 36.57% |
|                        | Jan-May | 0.97% ± 43.26%   | -10.54% ± 71.89% | 0.83% ± 59.73%   | -4.91% ± 38.20%  |
| GOSAT XCO <sub>2</sub> | Jan     | 0.53% ± 0.52%    | 0.60% ± 0.52%    | 0.42% ± 0.52%    | 0.65% ± 0.52%    |
|                        | Feb     | 0.45% ± 0.52%    | 0.53% ± 0.52%    | 0.65% ± 0.52%    | 0.44% ± 0.52%    |
|                        | Mar     | 0.67% ± 0.52%    | 0.37% ± 0.52%    | 0.51% ± 0.51%    | 0.66% ± 0.53%    |
|                        | Apr     | 0.48% ± 0.52%    | 0.46% ± 0.51%    | 0.39% ± 0.52%    | 0.51% ± 0.52%    |
|                        | May     | 0.66% ± 0.52%    | 0.59% ± 0.52%    | 0.45% ± 0.51%    | 0.78% ± 0.52%    |
|                        | Jan-May | 0.56% ± 0.52%    | 0.51% ± 0.51%    | 0.48% ± 0.51%    | 0.61% ± 0.52%    |
| TROPOMI CO             | Jan     | 2.67%±5.20%      | 4.94%±3.02%      | 2.37%±1.89%      | -0.41%±3.37%     |
|                        | Feb     | 0.47%±7.11%      | 2.97%±3.91%      | 1.08%±2.33%      | 3.23%±5.20%      |
|                        | Mar     | 3.98%±6.77%      | -1.84%±3.39%     | -1.14%±3.10%     | 2.12%±3.45%      |
|                        | Jan-Mar | 2.38%±4.84%      | 1.85%±1.94%      | 0.72%±1.40%      | 1.66%±2.38%      |
| Site NO <sub>2</sub>   | Jan     | -18.05%±23.90%   | -3.80%±12.80%    |                  |                  |
|                        | Feb     | -30.33%±21.78%   | 14.98%±68.82%    |                  |                  |
|                        | Mar     | -23.03%±17.29%   | -8.98%±44.17%    |                  |                  |
|                        | Jan-Mar | -23.00%±14.97%   | 0.34%±79.05%     |                  |                  |
| Site PM <sub>2.5</sub> | Jan     | -2.67%±41.56%    | -8.77%±49.43%    |                  |                  |
|                        | Feb     | -26.71%±26.94%   | -14.78%±59.12%   |                  |                  |
|                        | Mar     | -21.80%±17.51%   | -20.55%±39.30%   |                  |                  |
|                        | Jan-Mar | -15.39%±19.06%   | -14.68%±40.49%   |                  |                  |
| Site CO                | Jan     | -5.89%±22.22%    | -12.35%±23.12%   |                  |                  |
|                        | Feb     | -19.60%±20.49%   | -6.19%±45.39%    |                  |                  |
|                        | Mar     | -14.24%±19.77%   | 4.94%±74.21%     |                  |                  |

|                                 |                |                             |                           |
|---------------------------------|----------------|-----------------------------|---------------------------|
|                                 | <b>Jan-Mar</b> | -12.51%±15.41%              | -5.11%±26.53%             |
| <b>Inventory NO<sub>2</sub></b> | <b>Jan</b>     |                             | -0.99%<br>(-1.36~-0.86%)  |
|                                 | <b>Feb</b>     |                             | 2.43%<br>(2.11~3.33%)     |
|                                 | <b>Mar</b>     | -15.49%<br>(-21.20~-13.46%) | -7.72%<br>(-10.58~-6.72%) |
|                                 | <b>Jan-Mar</b> | -17.47%<br>(-23.94~-15.20%) | -2.57%<br>(-3.52~-2.24%)  |

146

147

148 **Supplementary Table 7 | Percentage uncertainty for daily emission 2020**

| <b>Items</b>                                | <b>Uncertainty Range</b> |
|---------------------------------------------|--------------------------|
| Power                                       | ±14.0%                   |
| Ground transport                            | ±9.3%                    |
| Industry                                    | ±36.0%                   |
| Residential                                 | ±40.0%                   |
| Aviation                                    | ±10.2%                   |
| International shipping                      | ±13.0%                   |
| Projection of emissions growth rate in 2019 | ±0.8%                    |
| EDGAR emissions in 2018                     | ±5.0%                    |
| <b>Overall</b>                              | <b>±7.2%</b>             |

149

150

151 **Supplementary Note 1 Comparison of Liu et al. and Le Quéré et al.**

152 As requested by reviewer and editor, we compared our study with the recently published  
153 work<sup>2</sup> by Le Quéré et al. that addressed a similar topic although with a different approach  
154 when looking in details:

155 In short:

156 Le Quéré et al. relied on confinement index intensity to attribute changes of CO<sub>2</sub> emissions  
157 due to COVID-19 pandemic. Le Quéré et al. assumed that emissions reductions scaled  
158 linearly according to activity data for selected periods / countries and established  
159 relationships between % change activity data and confinement indexes severity. These  
160 relationships were then applied with daily confinement indexes to infer emission changes per  
161 sector / country.

162 In this approach, only COVID (confinement) effects on emissions were modeled, not effects  
163 of other factors which also drove actual daily emissions in 2020: changes of weather (cold /  
164 mild winter) or in energy mix for power production, due to low gas price at the same time as  
165 the confinement. When confinement levels returned to zero, real emissions can be reduced or  
166 increased and by construction the approach of Le Quéré et al. cannot track those changes.

167 In our study, we used daily activity data to quantify emissions for all sectors, which allows  
168 continuing to track daily emission dynamics after the end of the lockdowns. At face value,  
169 our approach gives an assessment of actual emissions changes from all factors, including  
170 dominant effects of COVID during the lockdown but also effect of warm winter weather,  
171 rebounds of industry emissions after confinements, continued depletion of transport  
172 emissions (especially aviation), and changes of energy mix (power sector emissions). Our  
173 methodology also captures emission reductions during holidays when they happen, which can  
174 be on different days of the year across different years.

175

176 In more details:

177 We document below some key methodological differences.

178 Traffic emissions: Le Quéré et al. traffic emissions were scaled linearly with 7-days traffic  
179 TomTom congestion indices, supplemented by data from data from Apple (58 countries), the  
180 US MS2 corporation (20 states) and the UK government. Their approach was to take %  
181 changes of those indices in the week of April 4 at discrete confinement levels (as defined by  
182 policies in place) across the available datasets, and then apply this relationship (% changes of  
183 traffic indices vs discrete confinement level) according to daily confinement index in each  
184 country. The discrete nature of confinement index values explains why there are 'steps' in  
185 daily changes reconstructed from Le Quéré et al. when the index moves from one discrete  
186 value to another.

187 Instead, we used directly TomTom indices as a continuous variable because we accessed  
188 daily data in several cities within each country. We showed this index was a nonlinear  
189 function of the actual car flux (thus emissions) and calibrated and applied this nonlinear  
190 function to infer daily emissions from each country.

191

192 Residential emissions: Le Quéré et al. estimates were based on confinement indexes and  
193 electricity consumption for the city of London (assuming implicitly that electricity  
194 consumption may scale with fuel use in buildings). In our study, residential emissions are  
195 assumed to depend on temperature in cold countries and were estimated based on 2019 fuel  
196 consumption data with established temperature functions of temperature in 2019 and 2020.  
197 We adopted this approach after verifying that there has been no effect of confinement  
198 severity on residential emissions by analyzing actual daily natural gas residential  
199 consumption data in EU countries, where such data were available.

200 Power sector: Le Quéré et al. used daily electricity demand data and did not indicate energy  
201 mix changes coincident to the COVID period and used power production dataset for US,  
202 India and European Total (see table below) corrected for temperature. We included daily  
203 energy mix changes by using thermal production data to calculate power sector emissions and  
204 consider the changes of fuel mix in thermal production in the uncertainties, with data for 31  
205 countries. Our emission estimates are provided as actual values, not corrected for temperature  
206 but we also provide attribution to temperature vs. COVID in the manuscript.

207 Aviation emissions Le Quéré et al. used weekly OAG global flight numbers. We used  
208 individual flight data (thus daily) split into countries between domestic and international  
209 emissions

210 Industry fuel use: Le Quéré et al. used total coal consumption and we used actual production  
211 data for China. Le Quéré et al. used confinement indexes for other countries. We used  
212 production indexes for the other countries and confinement in ROW.

213

214 Importantly, Le Quéré's paper indicated the urgent need and research gap of the real time  
215 CO<sub>2</sub> study, which has exactly been addressed by our research:

216 "Despite the critical importance of CO<sub>2</sub> emissions for understanding global climate change,  
217 **systems are not in place to monitor global emissions in real time.**" (page 1 paragraph 3 in  
218 Le Quéré paper<sup>2</sup>)

219



|                |                                                              | <b>Liu et al. paper</b>                                                                                                         | <b>Le Quéré et al. paper</b>                                                                                                                                                                                      |
|----------------|--------------------------------------------------------------|---------------------------------------------------------------------------------------------------------------------------------|-------------------------------------------------------------------------------------------------------------------------------------------------------------------------------------------------------------------|
| <b>Results</b> | Missions for each day                                        | Included for 2019 and January-June 2020 based on continuous daily activity data with some sectors updated to July               | Daily emission decline caused by COVID only based on relationship between confinement levels and activity data for the period January-April 2020 (duration of confinement period)                                 |
|                | Weekly difference                                            | Considered                                                                                                                      | N/A                                                                                                                                                                                                               |
|                | Seasonality                                                  | Considered whole year 2019 and 2020 seasonality                                                                                 | Considered by HDD for power sector during January-April 2020                                                                                                                                                      |
|                | Holidays                                                     | Considered                                                                                                                      | N/A                                                                                                                                                                                                               |
|                | Changes in the energy mix or e.g. the fossil/renewable ratio | Considered                                                                                                                      | N/A                                                                                                                                                                                                               |
|                | Temperature effects on power and residential emissions       | Considered for both sectors                                                                                                     | Considered for power sector                                                                                                                                                                                       |
| <b>Method</b>  | Total                                                        | Estimated daily emissions based on actual daily activity data in each country                                                   | Confinement index based: establish % activity change at each confinement level across the available datasets, and then apply those % changes according to confinement levels in place on each day in each country |
|                | Sector-Power                                                 | Hourly to daily thermal production for 31 countries including variable fuel mix; Temperature effects separated for each country | Relationship between confinement levels and daily temperature corrected electricity generation data in U.S., European countries (as a total), and India                                                           |
|                | Sector-Industry                                              | Emissions based on industrial production or industry output index data in each country                                          | Confinement index based on daily coal consumption data for the six largest coal companies in China                                                                                                                |
|                | Sector-Surface Transport                                     | TomTom congestion Index-Emission' model calibrated against car flux data (in                                                    | Confinement index based: establish fixed % traffic proxies (TomTom, Apple, US MS2, UK)                                                                                                                            |

|             |                                   |                                                                                                                                                  |                                                                                                                                                                          |
|-------------|-----------------------------------|--------------------------------------------------------------------------------------------------------------------------------------------------|--------------------------------------------------------------------------------------------------------------------------------------------------------------------------|
|             |                                   | Paris). This emission model evaluated for few other cities                                                                                       | and changes at each confinement level across the available datasets, and then apply those % changes according to confinement levels in place on each day in each country |
|             | Sector-Commercial and Residential | Population-weighted heating degree days in 206 countries assuming no direct effect of COVID on sector's fuel consumption                         | Public: estimated by the changes in transport sector and electricity sector                                                                                              |
|             |                                   | This assumption was partly verified by daily natural gas consumption by commercial and residential buildings in France, Italy, Belgium and Spain | Residential: emission changes inferred from residential electricity use monitored with UK smart meters                                                                   |
|             | Sector-Aviation                   | Daily individual flight distance with each aircraft type by Flight Radar24                                                                       | weekly flight numbers by OAG                                                                                                                                             |
|             | Sector-Shipping                   | Decline ratio by reports                                                                                                                         | Projections of the World Trade Organization of -20% regardless of the confinement level                                                                                  |
| <b>Data</b> | Sector-Power                      | 31 countries                                                                                                                                     | (US, India and European Total)                                                                                                                                           |
|             | Sector-Industry                   | 62 countries                                                                                                                                     | China (six power companies) and US                                                                                                                                       |
|             | Sector-Surface Transport          | 57 countries and 416 cities                                                                                                                      | 63 countries and 413 cities                                                                                                                                              |
|             | Sector-Commercial and Residential | 206 countries                                                                                                                                    | UK                                                                                                                                                                       |
|             | Sector-Aviation                   | All countries                                                                                                                                    | 14 countries                                                                                                                                                             |
|             | Sector-Shipping                   | International Shipping (only global total)                                                                                                       | International Shipping (only global total)                                                                                                                               |

221

222

223 **Supplementary References:**

- 224 1. Wessel, Pål; Smith, Walter H. F. A global, self-consistent, hierarchical, high-resolution  
225 shoreline database. *Journal of Geophysical Research: Solid Earth*. 101 (B4): 8741–  
226 8743(1996). doi:10.1029/96JB00104
- 227 2. Le Quéré, C., Jackson, R.B., Jones, M.W. et al. Temporary reduction in daily global CO<sub>2</sub>  
228 emissions during the COVID-19 forced confinement. *Nat. Clim. Chang.* 10, 647–653 (2020).  
229 <https://doi.org/10.1038/s41558-020-0797-x>
